# Supplementary material for: GARP regulates the bioavailability and activation of TGFβ
Source: PubMed Central journal article supplement — Mol Biol Cell. 2012 Mar 15;23(6):1129–39. doi: 10.1091/mbc.E11-12-1018 (PMC3302739; doi:10.1091/mbc.e11-12-1018), 2012-03-15

## Supplementary Figure Legends

**Supplementary Figure 1. The GARP R395W mutant associates with the proTGF $\beta$ 1 C4S mutant.** A. The GARP R395W mutant supports surface LAP1 expression. 293T cells were transfected with the indicated plasmids. Surface FLAG-GARP and LAP1 expression were measured by FACS. B. The GARP R395W mutant interacts with proTGF $\beta$ 1. 293T cells were transfected with the indicated plasmids. The clarified lysates were immunoprecipitated with the indicated antibodies, and blotted with an anti-LAP1 antibody.

**Supplementary Figure 2.** A. Surface expression levels of  $\alpha_v$  integrins in stable cell lines. Stable 293T cell lines were generated as described in Methods, and surface expression of  $\alpha_v$  integrins in mock stable cell line (upper panel) and  $\alpha_v$  integrin stable cell lines (lower panel) was measured by FACS with antibodies against  $\alpha_v$  and  $\beta$  subunits. B. GARP interacts with proTGF $\beta$ 1 in the presence of the ECR3E fragment. 293T cells were transfected with the indicated plasmids. The clarified lysates were immunoprecipitated with the indicated antibodies, and blotted with an anti-LAP1 antibody.

**Supplementary Figure 3.** Gel filtration profile for the sGARP-proTGF $\beta$  complex and the sGARP-proTGF $\beta$ - $\alpha_v\beta_6$  ternary complex.

# Supplementary Figure 1

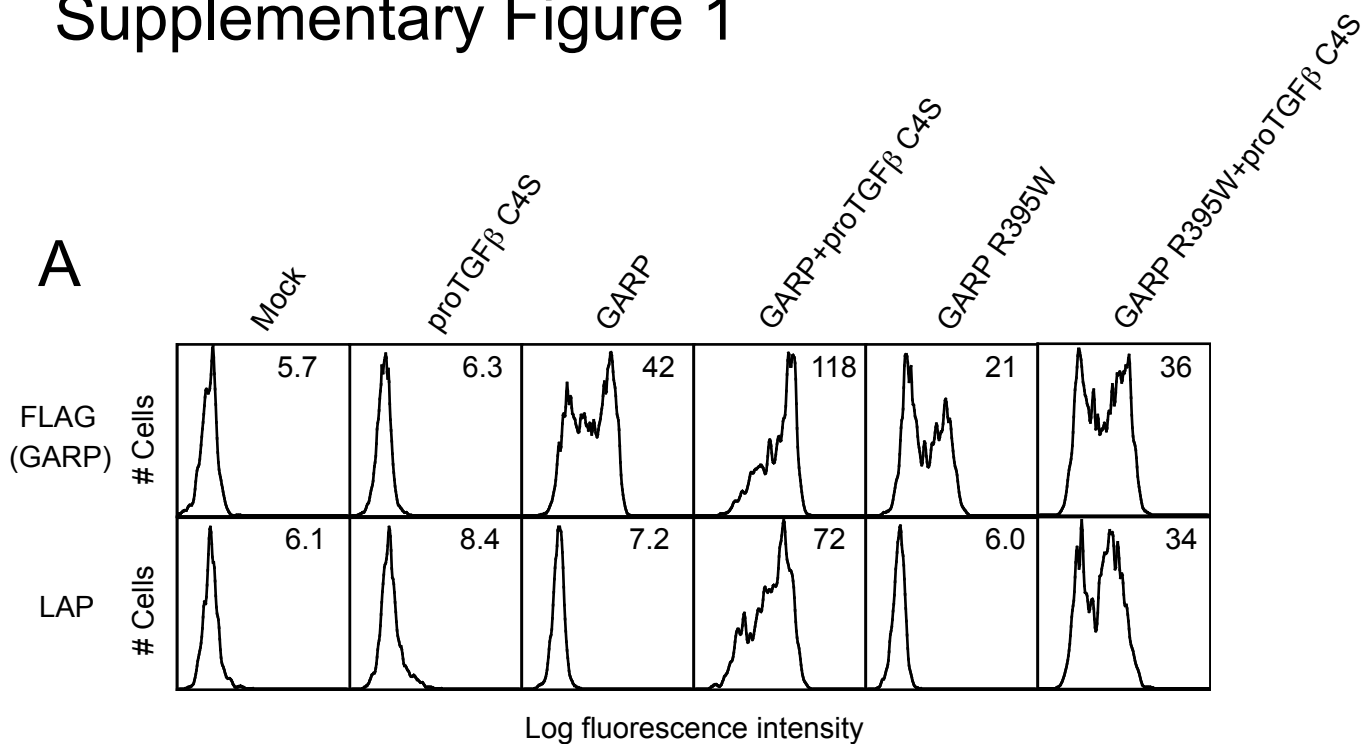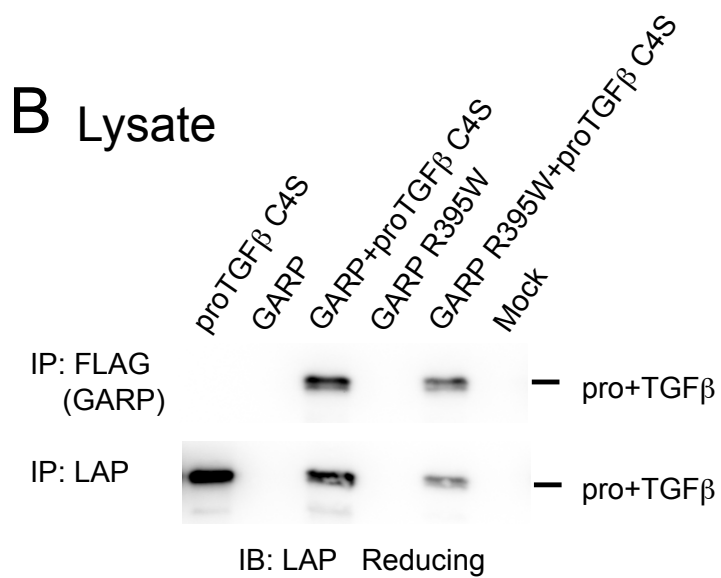

# Supplementary Figure 2

**A**

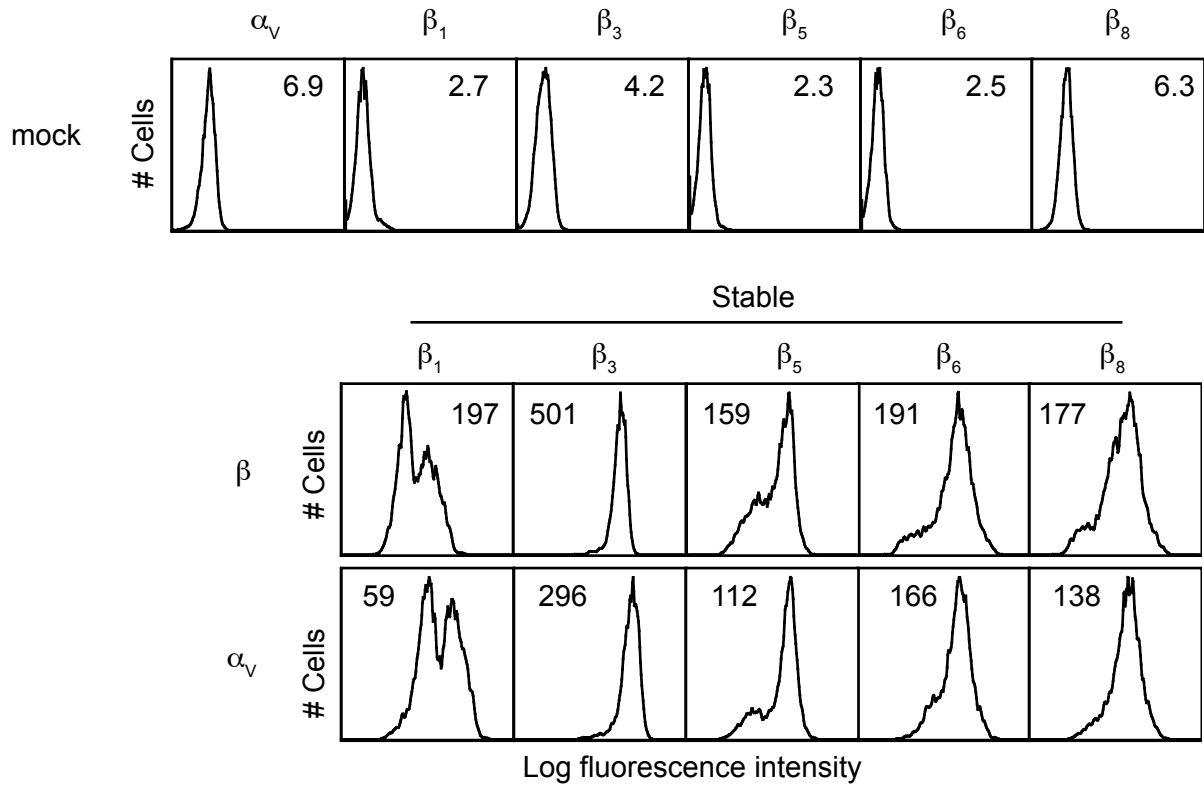

**B Lysate**

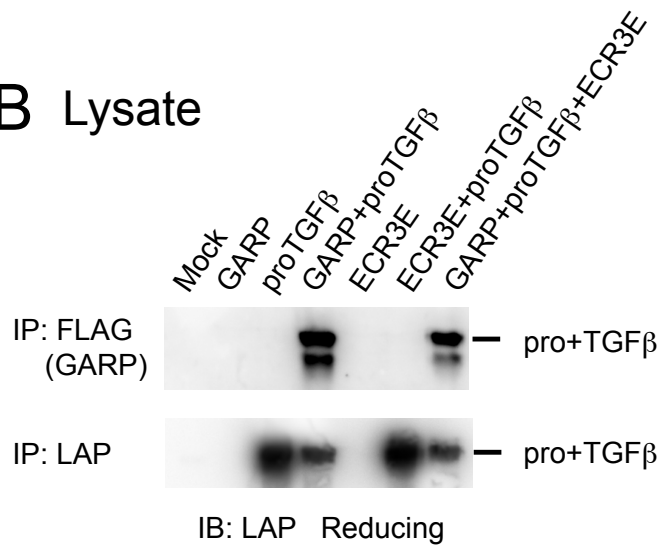

# Supplementary Figure 3

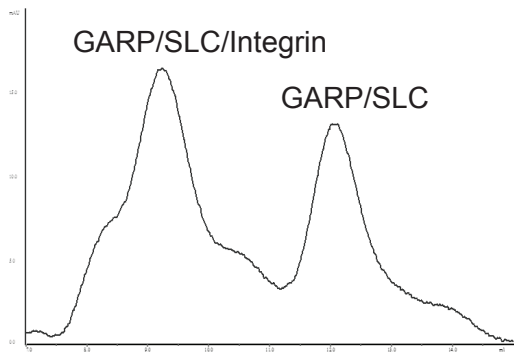

Supplement: supp_E11-12-1018_CombinedSupMats.pdf [file supp_E11-12-1018_CombinedSupMats.pdf]
